# Supplementary material
Source: PubMed Central journal article supplement (PMC4760165)
Supplement: rspb20152512supp1.pdf [file rspb20152512supp1.pdf]

**Table S1.** Location, network size (total species richness), specialization ( $\langle d' \rangle$ ), SRS (the proportion of smaller-ranged species) of the hummingbird-plant networks and null model corrected SRS (SRSz; see material and method section for algorithmic details).

| Network ID | Site                                             | Latitude | Longitude | Network Size | Specialization | SRS  | SRSz  |
|------------|--------------------------------------------------|----------|-----------|--------------|----------------|------|-------|
| 1          | Atlantic forest, SE Brazil                       | -20.75   | -42.92    | 22           | 0.43           | 0.00 | -0.45 |
| 2          | Montane meadow, SW USA                           | 34.22    | -116.95   | 6            | 0.00           | 0.00 | 0.00  |
| 3          | Sub-alpine meadow, Central USA                   | 38.98    | -106.97   | 4            | 0.01           | 0.00 | -0.12 |
| 4          | Atlantic forest, SE Brazil                       | -23.35   | -44.83    | 54           | 0.49           | 0.08 | 0.84  |
| 5          | Tropical dry deciduous forest, W Mexico          | 19.5     | -105.05   | 20           | 0.35           | 0.00 | -0.58 |
| 6          | Pampa, S Brazil                                  | -31.8    | -52.42    | 35           | 0.23           | 0.00 | -0.48 |
| 7          | Highland Atlantic forest, SE Brazil              | -22.5    | -44.83    | 37           | 0.46           | 0.00 | -0.34 |
| 8          | Caatinga, NE Brazil                              | -7.87    | -36.4     | 36           | 0.07           | 0.00 | -0.41 |
| 9          | Altitudinal caatinga, NE Brazil                  | -11.48   | -41.32    | 35           | 0.35           | 0.13 | 1.47  |
| 10         | Amazonas riverine, SE Colombia                   | -3.82    | -70.27    | 46           | 0.50           | 0.00 | -0.64 |
| 11         | High andean forest, Colombia                     | 1.25     | -77.43    | 40           | 0.49           | 0.44 | 1.62  |
| 12         | Atlantic Forest, low elevation                   | -27.27   | -49.01    | 24           | 0.67           | 0.17 | 2.99  |
| 13         | Atlantic Forest, mid elevation                   | -27.26   | -49.02    | 14           | 0.29           | 0.00 | -0.30 |
| 14         | Atlantic Forest, high elevation                  | -27.26   | -49.02    | 11           | 0.38           | 0.00 | -0.19 |
| 15         | Highland temperate mosaic forest, Central Mexico | 19.23    | -98.97    | 21           | 0.15           | 0.00 | -0.95 |

| <b>Network</b> | <b>Site</b>                             | <b>Latitude</b> | <b>Longitude</b> | <b>Network</b> | <b>Specialization</b> | <b>SRS</b> | <b>SRSz</b> |
|----------------|-----------------------------------------|-----------------|------------------|----------------|-----------------------|------------|-------------|
| <b>ID</b>      |                                         |                 |                  | <b>Size</b>    |                       |            |             |
| 16             | Suburban forest, Central Mexico         | 19.28           | -98.23           | 10             | 0.07                  | 0.00       | -0.64       |
| 17             | Protected cloud forest, Central Mexico  | 19.5            | -96.95           | 15             | 0.19                  | 0.00       | -1.37       |
| 18             | Rainforest, Colombia                    | 0.07            | -72.45           | 52             | 0.52                  | 0.13       | 1.54        |
| 19             | Caatinga forest, NE Brazil              | -8.6            | -38.57           | 11             | 0.18                  | 0.00       | -0.25       |
| 20             | Highland caatinga, NE Brazil            | -13.12          | -41.58           | 35             | 0.41                  | 0.14       | 1.67        |
| 21             | Open cerrado, NE Brazil                 | -13.12          | -41.57           | 19             | 0.58                  | 0.13       | 1.30        |
| 22             | Campos rupestres, NE Brazil             | -12.98          | -41.33           | 42             | 0.44                  | 0.14       | 1.32        |
| 23             | Tropical pre-montane forest, Costa Rica | 10.27           | -84.08           | 33             | 0.66                  | 0.38       | 1.21        |
| 24             | Lower montane wet forest, Costa Rica    | 10.18           | -84.11           | 28             | 0.48                  | 0.44       | 2.17        |
| 25             | Tropical wet forest, Costa Rica         | 10.44           | -84.01           | 29             | 0.51                  | 0.13       | 0.10        |
| 26             | Cerrado, Central Brazil                 | -18.99          | -48.3            | 25             | 0.28                  | 0.00       | -0.41       |
| 27             | Cerrado, Central Brazil                 | -19.16          | -48.39           | 43             | 0.46                  | 0.00       | -0.40       |
| 28             | Cerrado, Central Brazil                 | -17.78          | -48.68           | 21             | 0.33                  | 0.00       | -0.44       |
| 29             | Protected cloud forest, Central Mexico  | 19.5            | -96.95           | 21             | 0.27                  | 0.00       | -1.52       |
| 30             | Pantanal wetland, SW Brazil             | -19.52          | -56.98           | 17             | 0.47                  | 0.00       | -0.24       |
| 31             | Campos rupestres, SE Brazil             | -19.25          | -43.52           | 56             | 0.70                  | 0.17       | 2.37        |
| 32             | Cerrado, W Brazil                       | -20.44          | -54.65           | 20             | 0.14                  | 0.00       | -0.40       |

| <b>Network</b> | <b>Site</b>                                | <b>Latitude</b> | <b>Longitude</b> | <b>Network</b> | <b>Specialization</b> | <b>SRS</b> | <b>SRSz</b> |
|----------------|--------------------------------------------|-----------------|------------------|----------------|-----------------------|------------|-------------|
| <b>ID</b>      |                                            |                 |                  | <b>Size</b>    |                       |            |             |
| 33             | Montane Forest, SE Brazil                  | -22.73          | -45.58           | 31             | 0.49                  | 0.00       | -0.40       |
| 34             | Andean forest, Colombia                    | 4.53            | -73.85           | 22             | 0.36                  | 0.33       | 0.93        |
| 35             | Andean forest, Colombia                    | 5.9             | -73.42           | 34             | 0.60                  | 0.17       | -0.21       |
| 36             | Andean forest, Colombia                    | 5.92            | -73.53           | 19             | 0.36                  | 0.17       | 0.76        |
| 37             | Coastal cloud forest, SE Brazil            | -23.63          | -45.85           | 31             | 0.41                  | 0.00       | -0.35       |
| 38             | Primary forest, Bolivia                    | -17.51          | -63.64           | 9              | 0.54                  | 0.17       | 1.86        |
| 39             | Primary forest, Bolivia                    | -16.96          | -65.41           | 9              | 0.51                  | 0.00       | -0.25       |
| 40             | Campo rupestre, W Brazil                   | -19.95          | -43.9            | 16             | 0.12                  | 0.00       | -0.43       |
| 41             | Atlantic forest, SE Brazil                 | -23.28          | -45.05           | 56             | 0.51                  | 0.00       | -0.39       |
| 42             | Subtropical humid montane forest, Perú     | -13.22          | -72.12           | 12             | 0.39                  | 0.33       | 0.90        |
| 43             | Lowland primary forest, Perú               | -12.85          | -69.37           | 15             | 0.17                  | 0.00       | -0.48       |
| 44             | Andean rainforest, mid-elevation, Ecuador. | -0.02           | -78.77           | 84             | 0.32                  | 0.37       | 1.99        |
| 45             | Elfin forest, Costa Rica                   | 9.57            | -83.73           | 22             | 0.62                  | 0.50       | 2.10        |
| 46             | Undisturbed highland páramo, Costa Rica    | 9.48            | -83.48           | 30             | 0.78                  | 0.60       | 2.45        |

## Source references

- 1 Abreu, CRM & Vieira, MF. 2004. Os beija-flores e seus recursos florais em um fragmento florestal de Viçosa, sudeste brasileiro. *Lundiana* 5: 129-134.
  - 2 Alarcón, R., N. M. Waser & J. Ollerton. 2008. Year-to-year variation in the topology of a plant-pollinator interaction network. *Oikos* 117:1796-1807.
  - 3 Ollerton, J., R. Alarcón, N. M. Waser, M. V. Price, S. Watts, L. Cranmer, A. Hingston, C. Peter, & J. Rotenberry. 2009. A global test of the pollination syndrome hypothesis. *Annals of Botany*: 103: 1471-1480.
  - 4 Araujo, AC 1996. Beija-flores e seus recursos florais numa área de planície costeira do litoral norte de São Paulo, sudeste do Brasil. MSc dissertation. UNICAMP. 69p.
  - 5 Arizmendi, MC & Ornelas, JF. 1990. Hummingbirds and their floral resources in a tropical dry forest in Mexico. *Biotropica* 22: 172-180.
-

- 6 Vizentin-Bugoni, J & Rui, AM. Unpublished data.
- 7 Canela, M.B.F. 2006. Interações entre plantas e beija-flores numa comunidade de floresta atlântica montana em itatiaia, RJ. Ph.D thesis, Universidade Estadual de Campinas.
- 8 Las Casas, FMG, Azevedo Júnior, SM & Dias Filho, MM. 2012. The community of hummingbirds (Aves: Trochilidae) and the assemblage of flowers in a Caatinga vegetation. *Brazilian Journal of Biology*, 72: 51-58.
- 9 Moura, AC & Machado, CG. Hummingbirds and their flowers at altitudinal dryland vegetation in Chapada Diamantina, northeast Brazil. *In preparation*.
- 10 Cotton, P.A. 1998 The hummingbird community of a lowland Amazonian rainforest. *Ibis*, 140: 512-521.
- 11 Gutierrez Zamora, EA & Rojas Nossa, SV. 2001. Dinámica anual de la interacción colibrí-flor en ecosistemas altoandinos del volcán
-

- Galeras, Sur de Colombia. MSc dissertation, Universidad Nacional de Colombia.
- 12 Kohler, G. 2011. Redes de interação planta-beija-flor em um gradiente altitudinal de Floresta Atlântica no Sul do Brasil. MSc dissertation, Universidade Federal do Paraná, Curitiba, Brazil.
- 13 Kohler, G. 2011. Redes de interação planta-beija-flor em um gradiente altitudinal de Floresta Atlântica no Sul do Brasil. MSc dissertation, Universidade Federal do Paraná, Curitiba, Brazil.
- 14 Kohler, G. 2011. Redes de interação planta-beija-flor em um gradiente altitudinal de Floresta Atlântica no Sul do Brasil. MSc dissertation, Universidade Federal do Paraná, Curitiba, Brazil.
- 15 Lara, C. 2006. Temporal dynamics of flower use by hummingbirds in a highland temperate forest in México. *Ecoscience*, 13: 23-29.
- 16 Lara, C. Unpublished data.
- 17 Lara, C. Unpublished data.
-

- 18 Rosero, L. 2003. Interações planta/beija-flor em três comunidades vegetais da parte sul do Parque Nacional Natural Chiribiquete, Amazonas (Colombia).
- Rosero-Lasprilla, L & Sazima, M. 2004. Interacciones planta-colibrí en tres comunidades Vegetales de la parte suroriental del Parque Nacional Natural Chiribiquete, Colombia. *Ornitologia Neotropical* 15, 183–190.
- 19 Leal, FC, Lopes, AV & Machado, IC. 2006. Polinização por beija-flores em uma área de caatinga no Município de Floresta, Pernambuco, Nordeste do Brasil. *Revista Brasil. Bot.* 29: 379-389.
- 20 Machado, C.G. 2009. Hummingbirds (Aves: Trochilidae) and their floral resources in an area of caatinga vegetation in the Chapada Diamantina, Bahia State, Northeast Brazil. *Zoologia*, 26: 55-65.
- 21 Machado, C. G. 2014. The hummingbird community and the plants which they visit at a savannah in the Chapada Diamantina, Bahia, Brazil, *Bioscience Journal*, 2014, 30: 1578-1587
-

- 22 Machado, C.G., Coelho, A.G., Santana, C.S., Rodrigues, M. 2007. Hummingbirds and their flowers in the ‘campos rupestres’ of Chapada Diamantina, Bahia, northeastern Brazil. *Revista Brasileira de Ornitologia*,15: 215-227
- 23 Maglianesi, MA, N Blüthgen, K Böhning-Gaese and M Schleuning. 2014. Morphological traits determine specialization and resource use in plant–hummingbird networks in the Neotropics *Ecology* 95:3325-3334.
- 24 Maglianesi, MA, N Blüthgen, K Böhning-Gaese and M Schleuning. 2014. Morphological traits determine specialization and resource use in plant–hummingbird networks in the Neotropics *Ecology* 95:3325-3334.
- 25 Maglianesi, MA, N Blüthgen, K Böhning-Gaese and M Schleuning. 2014. Morphological traits determine specialization and resource use in plant–hummingbird networks in the Neotropics *Ecology* 95:3325-3334.



- 26 Araújo, FP, Sazima, M & Oliveira, PE. 2013. The assembly of plants used as nectar sources by hummingbirds in a Cerrado area of Central Brazil. *Plant Systematics and Evolution*, 299: 1119-1133.
- Machado, AO. 2012. Diversidade de recursos florais para beija-flores nos cerrados do Triângulo mineiro e região. Ph.D thesis. Universidade Federal de Uberlândia.
- Maruyama, PK, Oliveira, GM, Ferreira, C, Dalsgaard, B & Oliveira, PE. 2013. Pollination syndromes ignored: importance of non-ornithophilous flowers to Neotropical savanna hummingbirds. *Naturwissenschaften*, 100: 1061-1068.
- 27 Araújo, FP, Sazima, M & Oliveira, PE. 2013. The assembly of plants used as nectar sources by hummingbirds in a Cerrado area of Central Brazil. *Plant Systematics and Evolution*, 299: 1119-1133.
- Machado, AO. 2012. Diversidade de recursos florais para beija-flores nos cerrados do Triângulo mineiro e região. Ph.D Thesis. Universidade Federal de Uberlândia.
-

- Maruyama, PK, Oliveira, GM, Ferreira, C, Dalsgaard, B & Oliveira, PE. 2013. Pollination syndromes ignored: importance of non-ornithophilous flowers to Neotropical savanna hummingbirds. *Naturwissenschaften*, 100: 1061-1068.
- 28 Machado, AO. 2012. Diversidade de recursos florais para beija-flores nos cerrados do Triângulo mineiro e região. Ph.D Thesis. Universidade Federal de Uberlândia.
- 29 Ornelas, JF. Unpublished data.
- 30 Araujo, AC & Sazima, M 2003. The assemblage of flowers visited by hummingbirds in the “capões” of Southern Pantanal, Mato Grosso do Sul, Brazil. *Flora* 198: 427-435.
- 31 Rodrigues, LC & Rodrigues, M. 2014. Flowers visited by hummingbirds in the open habitats of the southeastern Brazilian moutaintops: species composition and seasonality. *Brazilian Journal of Biology*, 74(3): 659-676.
-

- 32 Rodrigues, LC. & Araujo AC. 2011. The hummingbird community and their floral resources in an urban forest remnant in Brazil. *Brazilian Journal of Biology*, 71: 611-622.
- 33 Sazima, I, Buzato, S & Sazima, M. 1996. An assemblage of hummingbird-pollinated flowers in a montane forest in southern Brazil. *Botanica Acta* 109: 149-160.
- 34 Snow DW, & Snow BK. 1980. Relationships between hummingbirds and flowers in the Andes of Colombia. *Bulletin of the British Museum of Natural History (Zoology)* 38: 105-139.
- 35 Snow DW, & Snow BK. 1980. Relationships between hummingbirds and flowers in the Andes of Colombia. *Bulletin of the British Museum of Natural History (Zoology)* 38: 105-139.
- 36 Snow DW, & Snow BK. 1980. Relationships between hummingbirds and flowers in the Andes of Colombia. *Bulletin of the British Museum of Natural History (Zoology)* 38: 105-139.
-

- 37 Snow DW, & Snow BK. 1986. Feeding ecology of hummingbirds in the Serra do Mar, southeastern Brazil. *Hornero* 012: 286-296.
- 38 Abrahamczyk S, Kessler M 2010. Hummingbird diversity, food niche characters, and assemblage composition along a latitudinal precipitation gradient in the Bolivian lowlands. *J. Ornithol.*, 151:615 – 625.
- 39 Abrahamczyk S, Kessler M 2010. Hummingbird diversity, food niche characters, and assemblage composition along a latitudinal precipitation gradient in the Bolivian lowlands. *J. Ornithol.*, 151:615 – 625.
- 40 De Vasconcelos, MF & Lombardi, JA. 1999. Padrão sazonal na ocorrência de duas espécies de beija-flores (Apodiformes: Trochilidae) em uma localidade de campo rupestre na Serra do Curral, Minas Gerais. *Ararajuba* 7: 71-79.
- 41 Vizentin-Bugoni, J., P. K. Maruyama and M. Sazima. 2014. Processes entangling interactions in communities: forbidden links are more
-

important than abundance in a hummingbird–plant network.

Proceedings of the Royal Society of London B 281:1–8.

42 Watts, S. 2008. Plant-flower visitor interaction in the Sacred Valley of Perú. PhD. thesis, University of Northampton, UK.

43 Watts, S. 2008. Plant-flower visitor interaction in the Sacred Valley of Perú. PhD. thesis, University of Northampton, UK.

44 Walther, BA & Brieschke, H. 2001. Hummingbird-flower relationships in a mid-elevation rainforest near Mindo, northwestern Ecuador. *International Journal of Ornithology* 4: 115-135.

45 Wolf, LL, Stiles, FG, & Hainsworth, FR. 1976. Ecological organization of a tropical, highland hummingbird community. *The Journal of Animal Ecology*, 45: 349-379.

46 Wolf, LL, Stiles, FG, & Hainsworth, FR. 1976. Ecological organization of a tropical, highland hummingbird community. *The Journal of Animal Ecology*, 45: 349-379.
